# Supplementary material for: Cyr61 synthesis is induced by interleukin-6 and promotes migration and invasion of fibroblast-like synoviocytes in rheumatoid arthritis
Source: PubMed Central journal article supplement (PMC7685583; doi:10.1186/s13075-020-02369-8), 2020-11-23

# Supplementary figure 1.

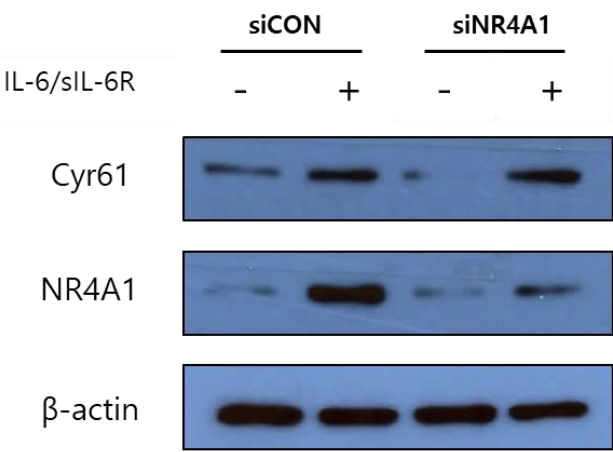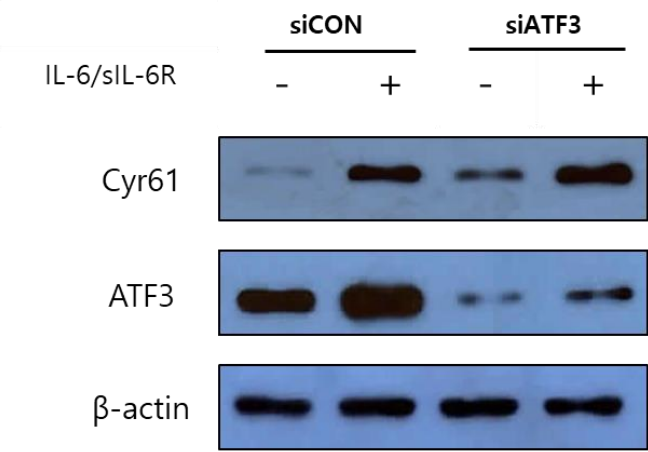

# Supplementary figure 2.

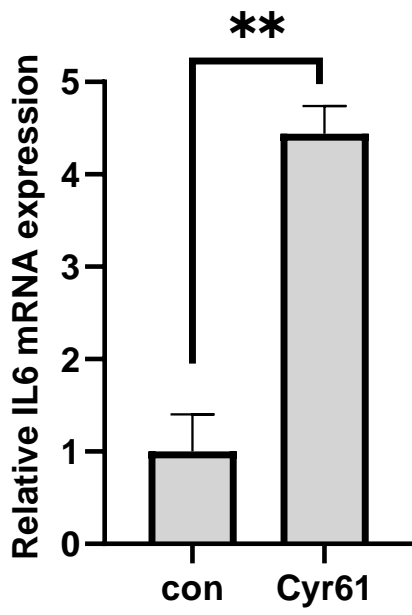

Supplement: 13075_2020_2369_MOESM1_ESM.pdf [file 13075_2020_2369_MOESM1_ESM.pdf]
